# Supplementary material
Source: MDPI journal article supplement (https://www.mdpi.com/2218-0532/89/4/48)
Supplement: s1 [file s1]

**Table S1:** Screening for Taxadiene Synthase producing bacteria

| Code # | Bacterial Isolate #                 | Taxadiene synthase<br>( $\mu\text{mol}/\text{mg}/\text{min}$ ) |
|--------|-------------------------------------|----------------------------------------------------------------|
| 1      | <b>1</b>                            | 0                                                              |
| 2      | <b>5</b>                            | 0                                                              |
| 3      | <b>11</b>                           | 0                                                              |
| 4      | <b>10</b>                           | 2.4                                                            |
| 5      | <b>13</b>                           | 0                                                              |
| 6      | <b>16</b>                           | 0                                                              |
| 7      | <b>20</b>                           | 0                                                              |
| 8      | <b>21</b>                           | 0                                                              |
| 9      | <b>23</b>                           | 0                                                              |
| 10     | <b>26</b>                           | 0                                                              |
| 11     | <b>30</b>                           | 0                                                              |
| 12     | <b>31</b>                           | 0                                                              |
| 13     | <b>32</b>                           | 0                                                              |
| 14     | <b>33</b>                           | 0                                                              |
| 15     | <b>34</b>                           | 0                                                              |
| 16     | <b>35</b>                           | 0                                                              |
| 17     | <b>36</b>                           | 0                                                              |
| 18     | <b>37</b>                           | 2.1                                                            |
| 19     | <b>38</b>                           | 1.9                                                            |
| 20     | <b>39</b>                           | 2.6                                                            |
| 21     | <b>40</b>                           | 2.5                                                            |
| 22     | <i>Bacillus koreensis</i>           | 8.88                                                           |
| 23     | <i>Stenotrophomonas maltophilia</i> | 4.62                                                           |

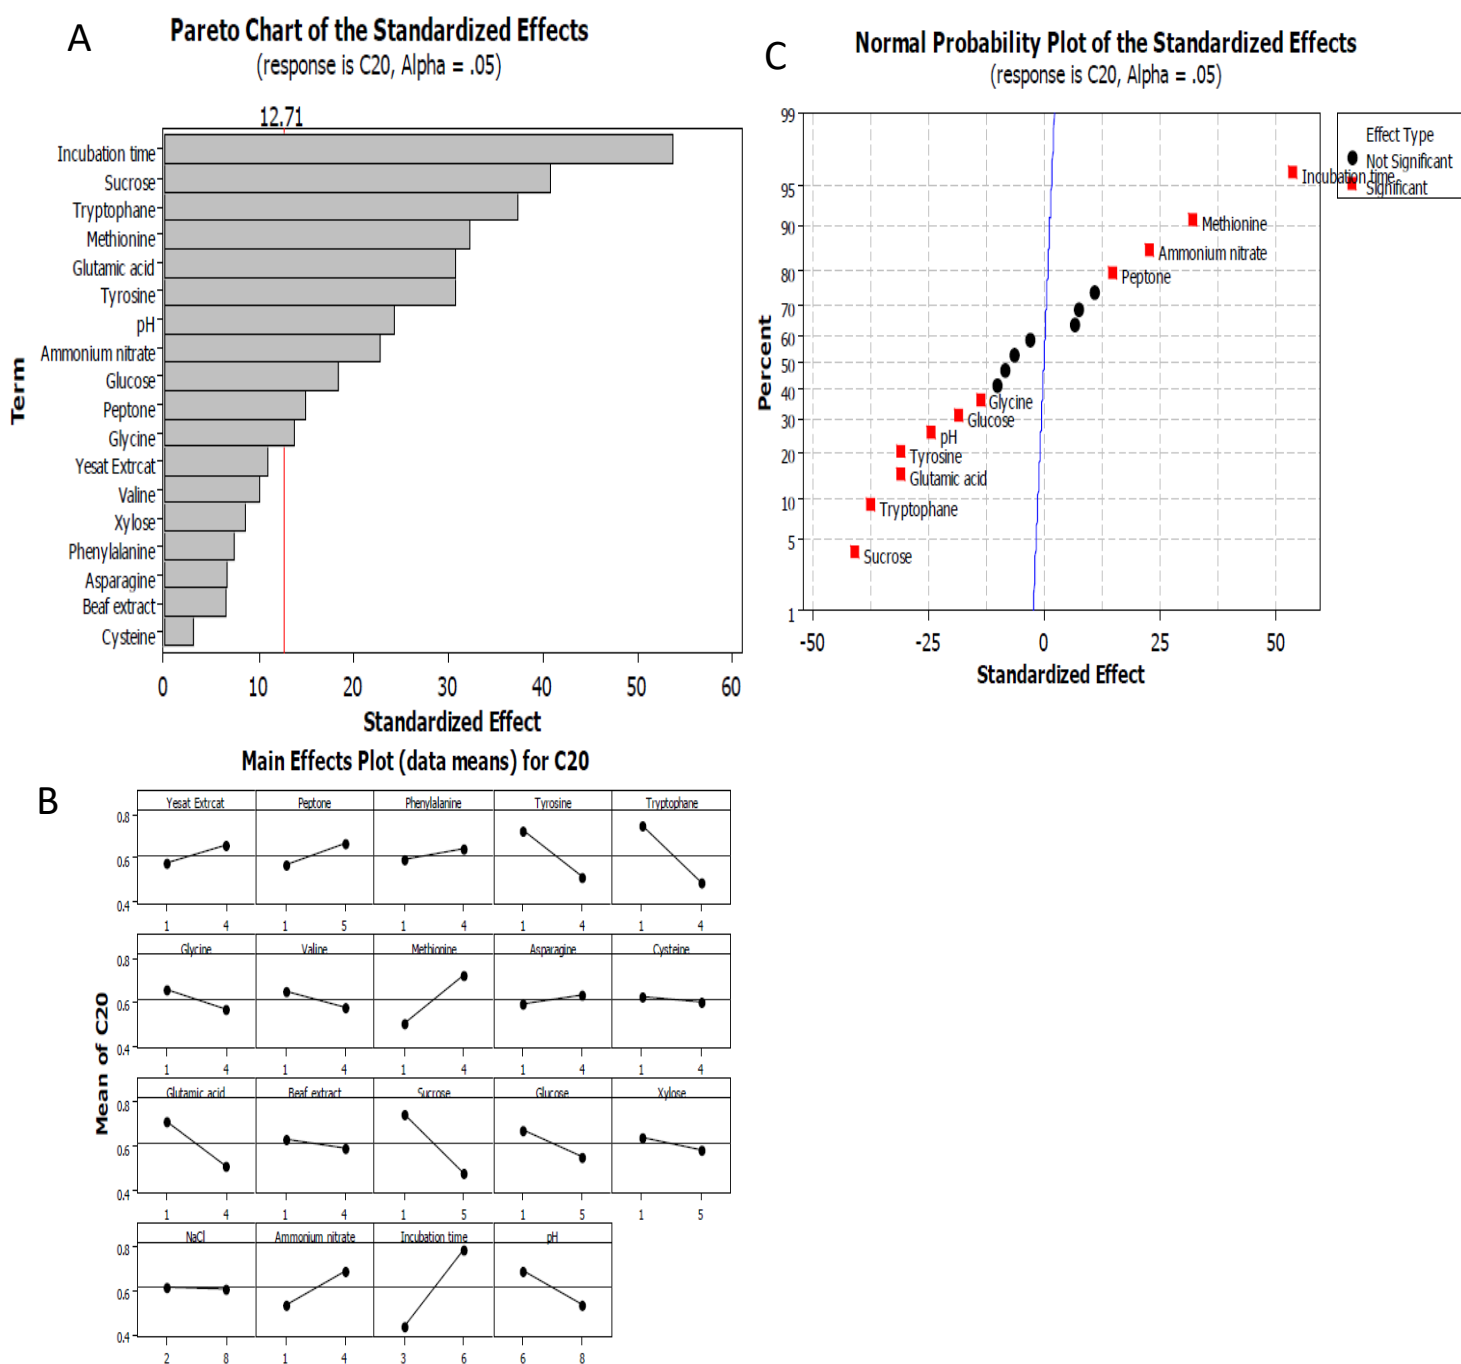

**Figure S1.** Nutritional optimization of *Bacillus koreensis* for maximizing the yield of DS production using the response surface methodology by Plackett-Burman design. A, Pareto Chart of the standardized effect of the tested variables for TDS production by *B. koreensis*. B, Main effects of the nineteen tested variables affecting TDS production. C, Normal probability of the standardized effects of the variables.
